# Supplementary material for: Seasonal hydrology drives rapid shifts in the flux and composition of dissolved and particulate organic carbon and major and trace ions in the Fraser River, Canada
Source: Copernicus journal article supplement (doi:10.5194/bg-12-5597-2015), 2015-10-01
Supplement: Supplementary file 1 [file bg-12-5597-2015-supplement.zip]

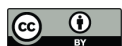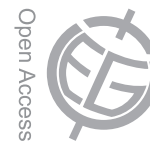

## *Supplement of*

# **Seasonal hydrology drives rapid shifts in the flux and composition of dissolved and particulate organic carbon and major and trace ions in the Fraser River, Canada**

**B. M. Voss et al.**

*Correspondence to:* B. M. Voss (bvoss@whoi.edu)

- bg-12-5597-2015-supplement-title-page.pdf
- Voss et al Supplementary Material 3Sept2015.docx
- fs1.TIF
- fs2.TIF
- fs3.TIF
- fs4.TIF
- fs5.TIF

The copyright of individual parts of the supplement might differ from the CC-BY 3.0 licence.
